# Supplementary material for: Structural diversity and magnetic properties of six ferrocenyl monocarboxylate Mn(ii), Ni(ii) and Co(ii) complexes with 1D aqua, carboxyl or dinuclear hydroxyl bridges
Source: Royal Society of Chemistry journal article supplement (doi:10.1039/d1ce00189b), 2021-01-01
Supplement: d1ce00189b1.pdf [file d1ce00189b1.pdf]

## Structural diversity and magnetic properties of six ferrocenyl monocarboxylate Mn(II), Ni(II) and Co(II) complexes with 1D aqua, carboxyl or dinuclear hydroxyl bridge

Misbha Rafiq Khan,<sup>a</sup> Xiaoge Niu,<sup>a</sup> Tianling Chen,<sup>a</sup> Yan Liu,<sup>a</sup> Zhongyi Liu,<sup>a</sup> Bin Liu,<sup>\*b</sup> Yuxia Zhang,<sup>c</sup> Jinpeng Li<sup>\*a</sup>

<sup>a</sup>College of Chemistry and Green Catalysis Center, Zhengzhou University, Zhengzhou, Henan 450001, P. R. China.

<sup>b</sup>Key Laboratory of Synthetic and Natural Functional Molecule Chemistry of Ministry of Education, College of Chemistry & Materials science, Shanxi Key Laboratory of Physico-Inorganic Chemistry, Northwest University, Xi'an 710069, P. R. China.

<sup>c</sup>School of Mathematics, Zhengzhou University of Aeronautics, Zhengzhou 450046, China.

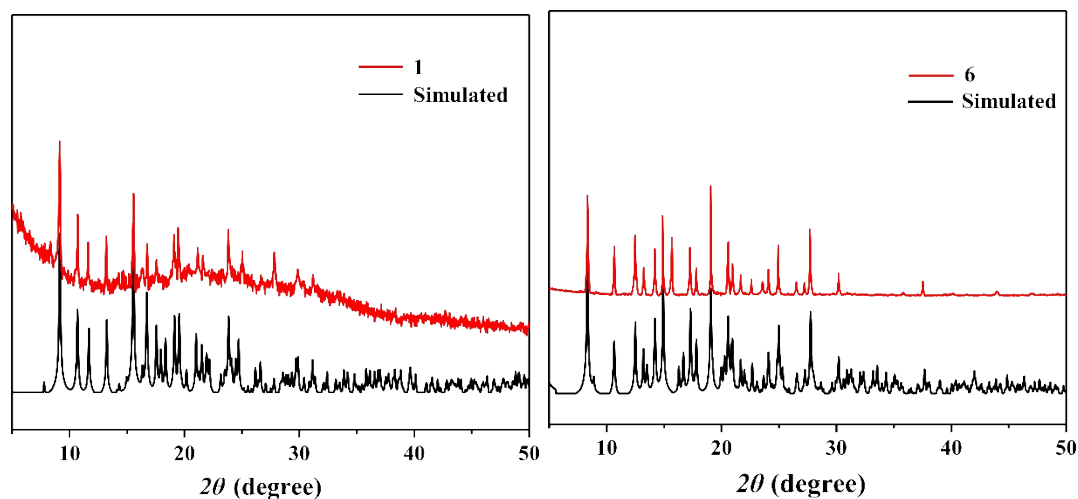

**Figure S1.** (a) Simulated PXRD pattern from the single crystal structure of **1** (black), observed PXRD pattern of **1** at room temperature (red). (b) Simulated PXRD pattern from the single crystal of **6** (black), observed PXRD pattern of **6** at room temperature (red).

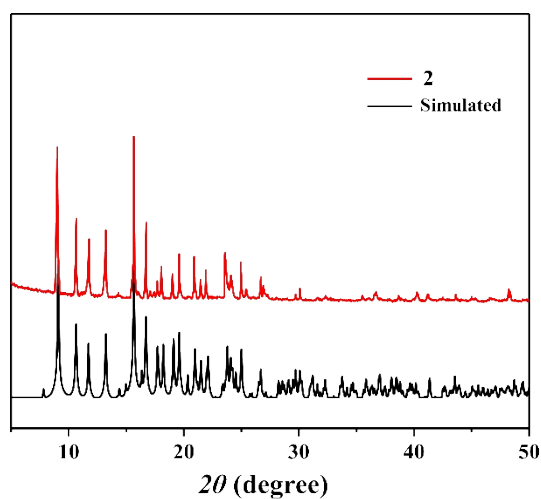

**Figure S2.** (a) Simulated PXRd pattern from the single crystal structure of **2** (black), observed PXRd pattern of **2** at room temperature (red).

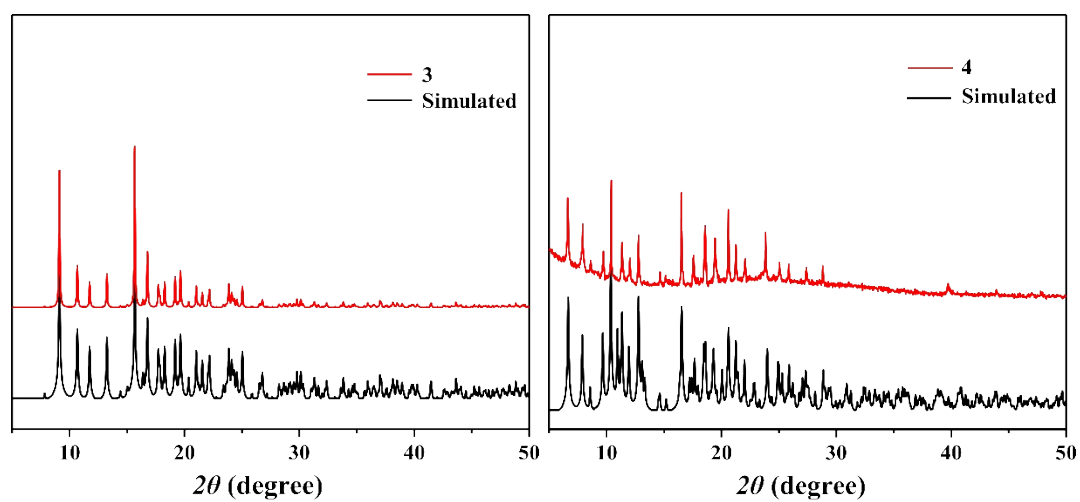

**Figure S3.** (a) Simulated PXRd pattern from the single crystal structure of **3** (black), observed PXRd pattern of **3** at room temperature (red). (b) Simulated PXRd pattern from the single crystal of **4** (black), observed PXRd pattern of **4** at room temperature (red).

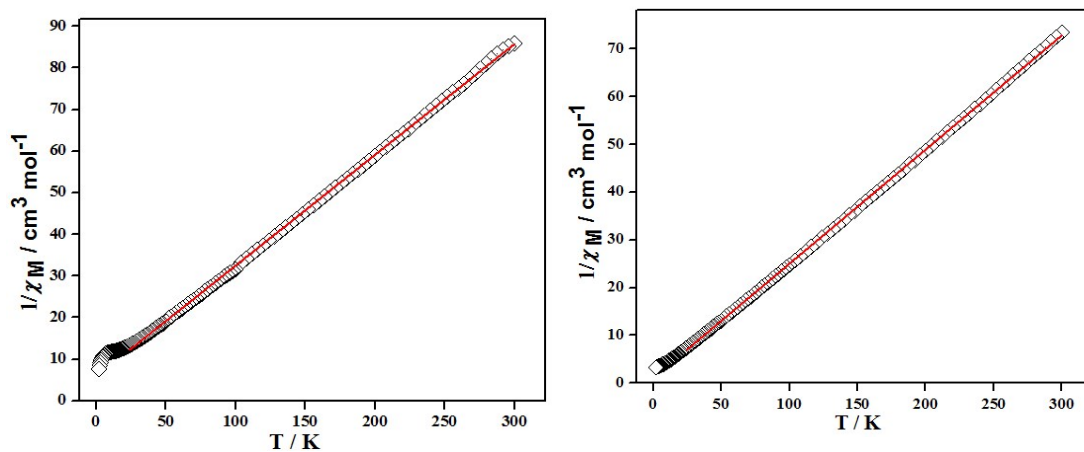

**Figure S4.** (a) Plot of  $\chi_M^{-1}$  vs T for **1**. (b) Plot of  $\chi_M^{-1}$  vs T for **6**.

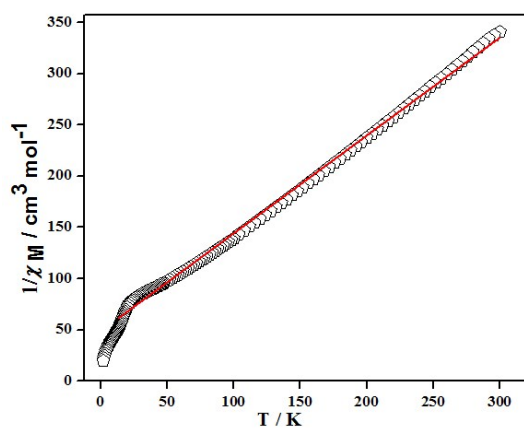

**Figure S5.** Plot of  $\chi_M^{-1}$  vs T for **2**.

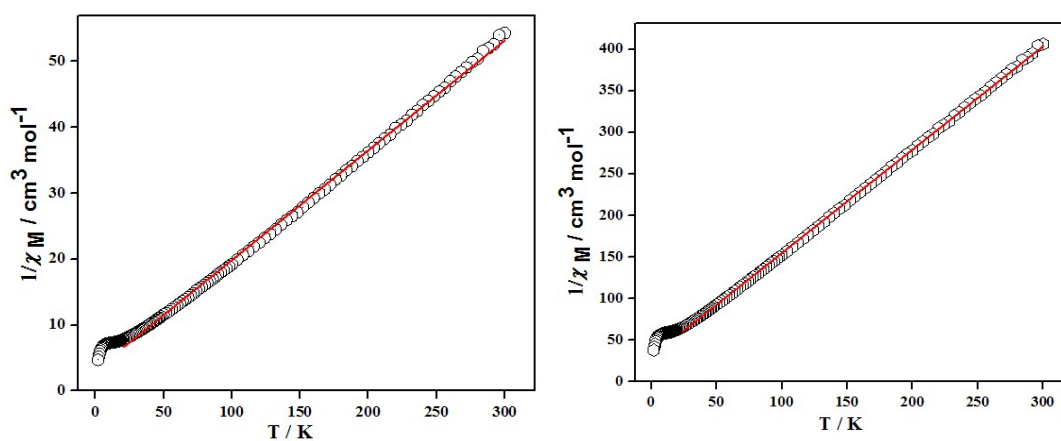

**Figure S6.** (a) Plot of  $\chi_M^{-1}$  vs T for **3**. (b) Plot of  $\chi_M^{-1}$  vs T for **4**.

**Table S1.** Selected bond lengths (Å) and angles (°) for **1-6**.

| Complex 1           |            |                     |            |                     |            |
|---------------------|------------|---------------------|------------|---------------------|------------|
| Mn(1)-O(3)          | 2.123(3)   | Mn(1)-O(1)          | 2.269(3)   | O(3)-Mn(1)-O(3)#1   | 180.0      |
| Mn(1)-O(2)          | 2.148(4)   | Co(2)-N(4)          | 2.035(3)   | O(3)-Mn(1)-O(2)#1   | 88.7(17)   |
| O(3)-Mn(1)-O(2)     | 91.32(17)  | O(3)-Mn(1)-O(1)#1   | 90.17(13)  | O(2)-Mn(1)-O(1)     | 93.14(16)  |
| O(3)#1-Mn(1)-O(2)   | 180.0      | O(3)#1-Mn(1)-O(1)#1 | 89.93(13)  | O(1)#1-Mn(1)-O(1)   | 180.0      |
| Mn(1)#2-O(1)-Mn(1)  | 128.0(3)   |                     |            |                     |            |
| Complex 2           |            |                     |            |                     |            |
| Ni(1)-O(1)          | 2.055c(3)  | Ni(1)-O(4)          | 2.075(3)   | Ni(1)-O(3)          | 2.22(17)   |
| O(1)-Ni(1)-O(1)#1   | 180.0      | O(1)-Ni(1)-O(4)#1   | 89.22(14)  | O(1)-Ni(1)-O(4)     | 90.78(14)  |
| O(4)#1-Ni(1)-O(4)   | 180.0      | O(1)-Ni(1)-O(3)#1   | 88.20(10)  | O(1)-Ni(1)-O(3)     | 91.80(10)  |
| O(4)-Ni(1)-O(3)     | 93.02(12)  | Ni(1)-O(3)-Ni(1)#2  | 130.6(2)   |                     |            |
| Complex 3           |            |                     |            |                     |            |
| Co(1)-O(2)          | 2.048(4)   | Co(1)-O(3)          | 2.212(2)   | O(2)#1-Co(1)-O(2)   | 180.0      |
| Co(1)-O(4)          | 2.089(4)   | O(2)#1-Co(1)-O(4)   | 89.11 (18) | O(2)-Co(1)-O(4)     | 90.90(18)  |
| O(4)-Co(1)-O(4)#1   | 180.0      | O(2)#1-Co(1)-O(3)   | 91.75(14)  | O(2)-Co(1)-O(3)     | 88.25(0)   |
| O(4)-Co(1)-O(3)     | 86.55(16)  | O(4)#1-Co(1)-O(3)   | 93.45(16)  | O(3)-Co(1)-O(3)#1   | 180.0      |
| Co(1)#2-O(3)-Co(1)  | 1301.0(3)  |                     |            |                     |            |
| Complex 4           |            |                     |            |                     |            |
| Co(1)-O(5)          | 1.996(3)   | Co(1)-O(5)#1        | 2.105(3)   | Co(1)-N(4)#1        | 2.134(4)   |
| Co(1)-N(1)          | 2.141(4)   | Co(1)-O(1)          | 2.177(3)   | Co(1)-O(2)          | 2.197(3)   |
| O(5)-Co(1)-O(5)#1   | 79.64(13)  | O(5)-Co(1)-N(4)#1   | 106.8(14)  | O(5)#1-Co(1)-N(4)#1 | 84.11(14)  |
| O(5)-Co(1)-O(1)     | 96.02(12)  | O(5)#1-Co(1)-N(1)   | 167.85(1)  | N(4)#1-Co(1)-N(1)   | 95.50(15)  |
| O(5)#1-Co(1)-O(1)   | 94.93(12)  | N(4)#1-Co(1)-O(1)   | 156.5(14)  | N(1)-Co(1)-O(1)     | 90.22(14)  |
| O(5)-Co(1)-O(2)     | 154.8(12)  | O(5)#1-Co(1)-O(2)   | 93.32(12)  | N(4)#1-Co(1)-O(2)   | 96.37(14)  |
| N(1)-Co(1)-O(2)     | 98.78(14)  | O(1)-Co(1)-O(2)     | 60.23(12)  | Co(1)-O(5)-Co(1)#1  | 100.36(13) |
| Complex 5           |            |                     |            |                     |            |
| N(1)-Ni(1)          | 2.072(3)   | N(4)-Ni(1)#1        | 2.077(3)   | Ni(1)-O(3)          | 2.099(2)   |
| Ni(1)-O(3)#1        | 2.036(2)   | Ni(1)-O(2)          | 2.120(2)   | Ni(1)-O(1)          | 2.127(3)   |
| N(5)-N(4)-Ni(1)#1   | 117.5 (2)  | O(3)-Ni(1)-O(3)#1   | 80.7(9)    | O(3)-Ni(1)-N(1)     | 88.91(10)  |
| O(3)#1-Ni(1)-N(1)   | 169.01(10) | O(3)-Ni(1)-N(4)#1   | 100.69(1)  | O(3)#1-Ni(1)-N(4)#1 | 85.29(10)  |
| N(1)-Ni(1)-N(4)#1   | 93.39(12)  | O(3)-Ni(1)-O(2)     | 159.3(10)  | O(3)#1-Ni(1)-O(2)   | 95.16(9)   |
| N(1)-Ni(1)-O(2)     | 95.74(10)  | N(4)#1-Ni(1)-O(2)   | 99.06(11)  | O(3)-Ni(1)-O(1)     | 97.94(10)  |
| O(3)#1-Ni(1)-O(1)   | 92.23(9)   | N(1)-Ni(1)-O(1)     | 91.64(11)  | N(4)#1-Ni(1)-O(1)   | 160.5(10)  |
| O(2)-Ni(1)-O(1)     | 61.85(10)  | Ni(1)-O(3)-Ni(1)#1  | 99.64(9)   |                     |            |
| Complex 6           |            |                     |            |                     |            |
| Mn(1)-O(1)          | 2.120(4)   | Mn(1)-O(2)#2        | 2.204(4)   | Mn(1)-N(1)          | 2.292(8)   |
| O(2)-Mn(1)#3        | 2.204(4)   | O(1)#1-Mn(1)-O(1)   | 92.0(2)    | O(1)#1-Mn(1)-O(2)#2 | 104.31(17) |
| O(1)-Mn(1)-O(2)#2   | 88.20 (16) | O(2)#2-Mn(1)-O(2)#3 | 162.1(3)   | O(1)#1-Mn(1)-N(1)   | 97.2(3)    |
| O(1)-Mn(1)-N(1)     | 170.1(3)   | O(2)#2-Mn(1)-N(1)   | 86.2(2)    | O(2)#3-Mn(1)-N(1)   | 79.5(2)    |
| O(1)#1-Mn(1)-N(1)#1 | 170.1(12)  | N(1)-Mn(1)-N(1)#1   | 73.8(6)    |                     |            |

Symmetry transformations used to generate equivalent atoms:

For **1**: #1  $-x, -y+1, -z+1$ ; #2  $-x, y, -z+3/2$ .

For **2**: #1  $-x+2, -y+1, -z$ ; #2  $-x+2, y, -z-1/2$ .

For **3**: #1  $-x, -y+1, -z+2$ ; #2  $-x, y, -z+3/2$ .

For **4**: #1  $-x+1, -y+1, -z$ .

For **5**: #1  $-x, -y, -z+1$ .

For **6**: #1  $-x, y, -z+1/2$ ; #2  $x, -y+2, z-1/2$ ; #3  $-x, -y+2, -z+1$ .
